# Supplementary material
Source: PubMed Central journal article supplement (PMC4072023)
Supplement: JCI73469sd.pdf [file JCI73469sd.pdf]

## SUPPLEMENTAL METHODS

### Collection of clinical samples

***Normal and CF sputum collection:*** Sputum was collected from human subjects either by spontaneous expectoration or by sputum induction via three different protocols. For the first protocol, a large pool of sputum was collected from anonymized CF subjects with *Pseudomonas aeruginosa* (PsA) infection for studies of mucin proteolysis and immunogenicity (Figures 4, 5). For the second protocol, normal subjects were induced with hypertonic saline and spontaneous sputum was obtained from CF subjects for sputum mucin concentration analyses (Figures 1, 6). The spontaneously expectorated CF sputa were collected and stored in sterile cups on ice until diluted into 6M guanidine hydrochloride (GuHCl) at a 1:5 dilution. In this same protocol, sputum was collected from normal volunteers via induction as previously described (41). In brief, after obtaining informed consent, the subjects were administered nebulized albuterol followed by nebulized hypertonic saline at increasing doses of 3%, 4%, and 5% until able to produce a sample. All subjects performed throat clearance and nasal clearance prior to producing a sample. If an adequate sample was obtained at the lower doses of hypertonic saline, they did not progress to a higher concentration. The sputum samples were kept on ice until added to 6M GuHCl at a 1:5 dilution. For the third protocol, normal subjects were induced and CF subjects produced spontaneous sputum for osmotic pressure measurements (Figure 10). In this measurement, no GuHCl was added to the samples, and they were rapidly transported to the laboratory for analysis. The demographic data for each patient group are presented in Supplemental Table 1.

***Normal and CF pediatric BAL samples (Figure 2):*** Informed consent was obtained from parents of children undergoing clinically indicated bronchoscopy to obtain excess bronchoalveolar lavage (BAL) fluid and to access clinical information linked to BAL samples. Bronchoscopy with BAL was performed for clinical indications by a pediatric pulmonologist according to standard clinical practices. The location for BAL was based on radiographic findings, clinical examination, or bronchoscopic findings and was determined by the bronchoscopist. BAL was performed according to the established standard at UNC-CH, with instillation of 10 ml of non-bacteriostatic normal saline into each lavage site for patients <10 kg, 1 ml/kg for patients 10 - 20 kg, and 20 ml for patients >20 kg. Quantitative bacterial cultures were performed in the UNC Hospitals Clinical Microbiology Laboratory by standard protocols. After obtaining an aliquot of the excess BAL fluid for total and differential cell counts, the remaining fluid was aliquoted into 2 ml vials and frozen at -80 C. BAL fluid cell counts were determined using a hemocytometer. After cytocentrifugation, a modified Wright–Giemsa stain was used and differential cell counts were assessed with 200 consecutive cells examined under light microscopy.

**Viscosity measurement (supplementary figure 2):** The complex viscosity of the neutrophil treated samples were determined by shear dependence of the viscosity on a Bohlin Gemini Rheometer (Malvern Instruments, Worcestershire, UK), with a 50 mm diameter parallel plate and with a gap thickness of 50  $\mu$ m. Viscosity measurements were performed over a stress range of 0.01–1 Pa and at a frequency of 1 Hz. All analyses were performed at 23°C to minimize sample dehydration.

## SUPPLEMENTARY FIGURES

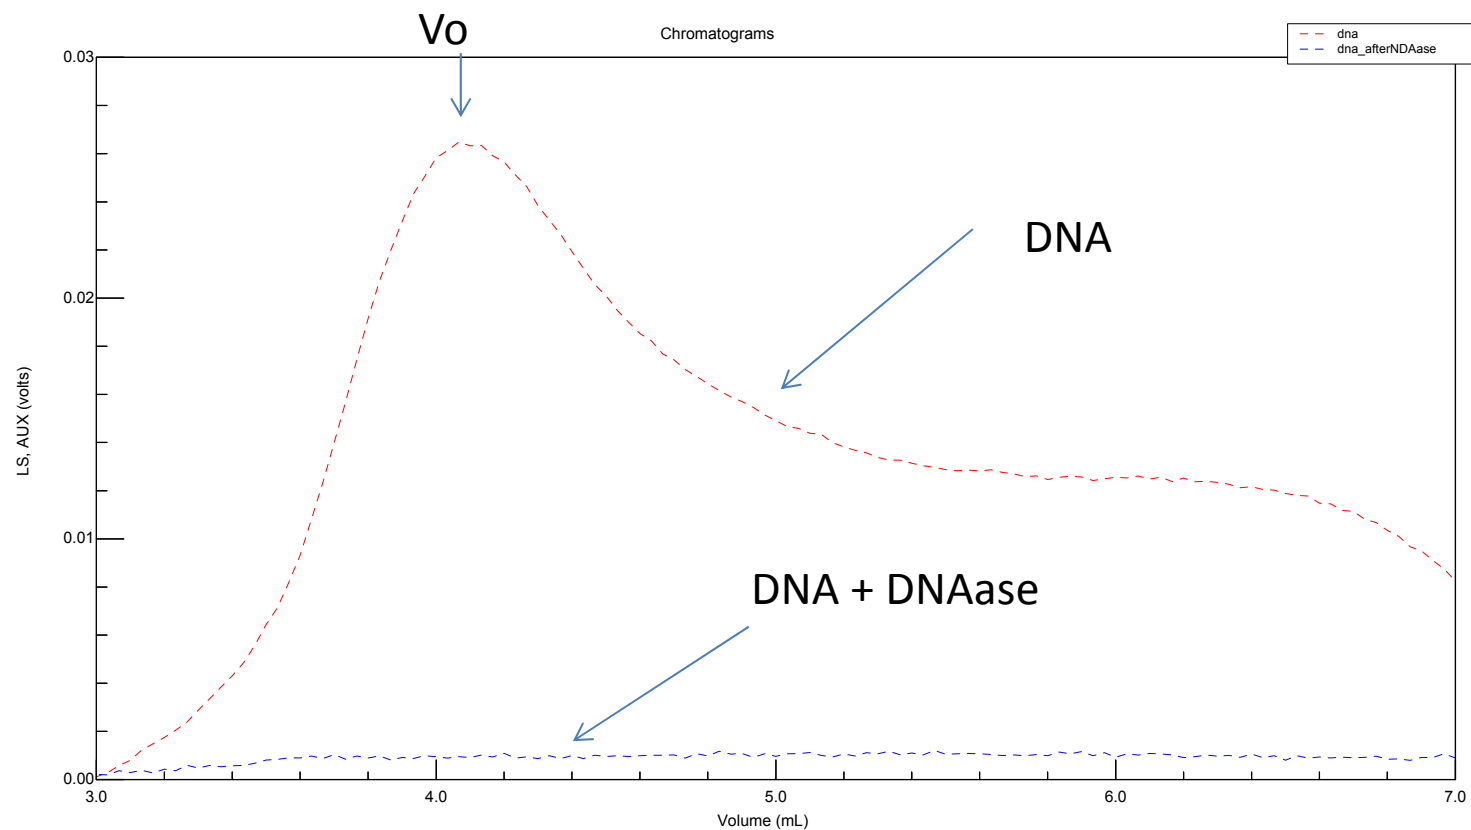

**Supplementary figure S1:** Screen shot from the refractometer, showing the primary refractive index data from an analysis of the void fraction from the CL2B chromatography of DNA and DNA treated with DNAase. DNA completely diminished from the Vo after DNA treatment indicating our DNA eliminating protocol of the mucus samples are effective.

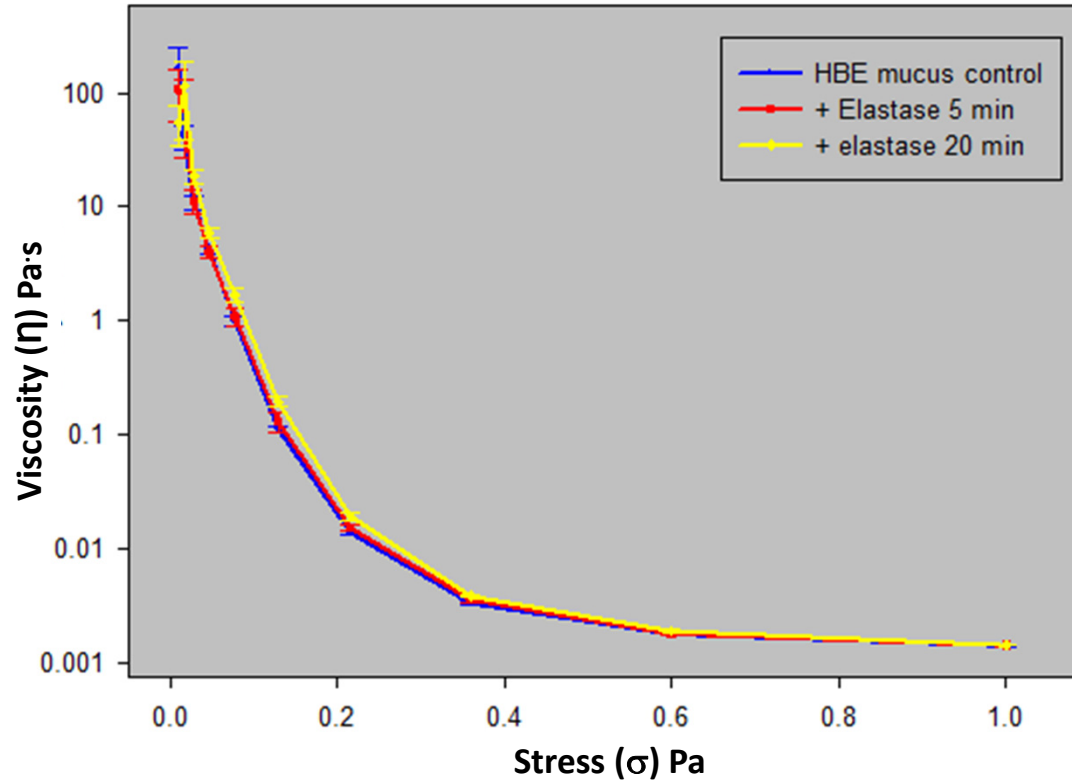

**Supplementary figure S2: The affect of neutrophil elastase on HBE mucus viscosity.** HBE mucus (% 2-3 solids) were incubated either with PBS or elastase for 5 and 20 minutes. The samples were then subjected to shear dependent viscosity measurement using a cone and plate rheometer. The output from a series of experiment is shown, where viscosity is plotted as a function of decreasing shear forces between 1- 0.001 Pa. Typically HBE mucus viscosity is dependent to shear stress and varies by 4-5 order of magnitude. No significant difference on shear dependent viscosity profile was observed on HBE mucus after 5 min and 20 elastase incubation, consistent with the result in the fig 3B in the main text.

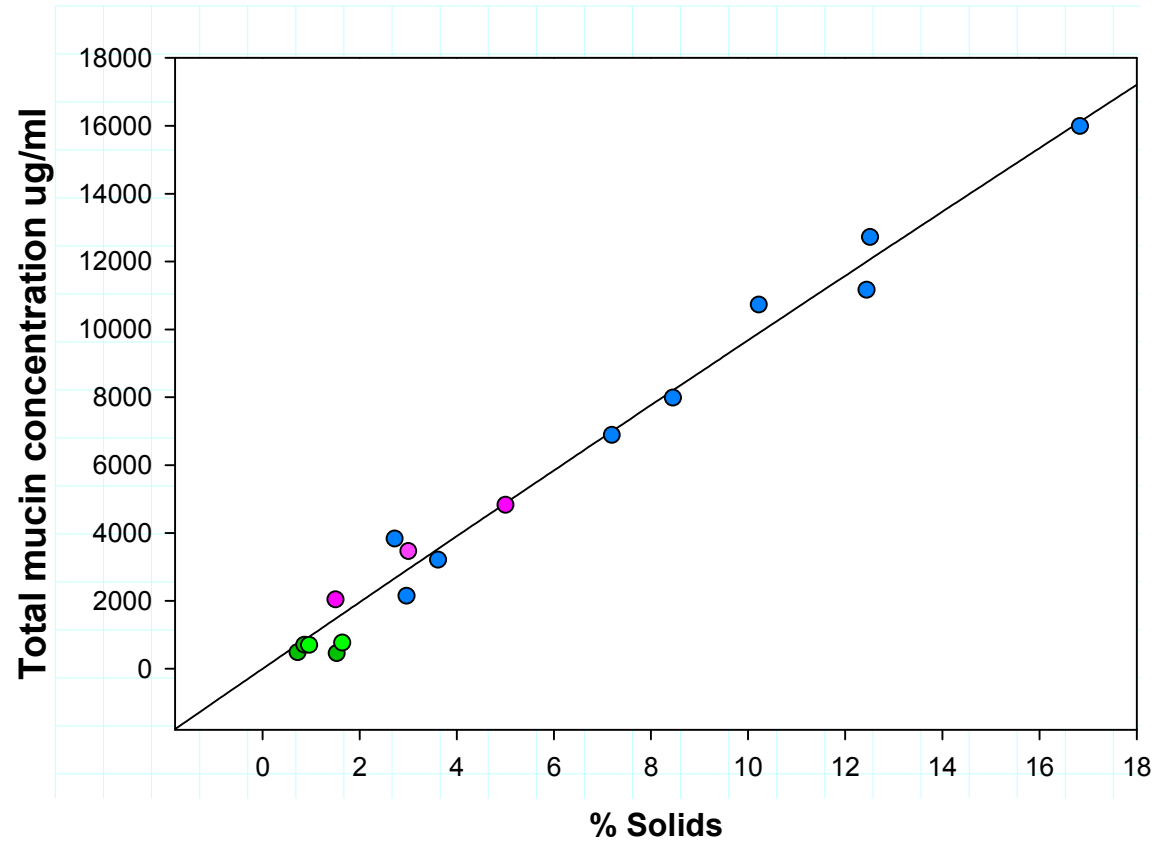

**Supplementary figure S3: Mucin concentration vs % solids of normal mucus and CF sputum:** Percent solids and total mucin concentrations were measured as explained in the material methods. Typically, there is a linear relationship between % solids and total mucin concentration ( $R^2 = 0.9855$ ) of airway mucin including normal in vivo mucus (green), CF sputum (blue) and different concentration of HBE mucus (magenta, 1.5%, 3% and 5%).

## Demographics for Figures 1 and 6

### NORMAL SAMPLES

|              | Subject # | age | gender | ht    | wt   | race  | FVC  | FVC % | FEV1 | FEV1% | ratio |
|--------------|-----------|-----|--------|-------|------|-------|------|-------|------|-------|-------|
| 423V11001441 | 211       | 23  | f      | 157.1 | 51   | w     | 3.22 | 95    | 2.58 | 87    | 0.8   |
| 423V11001203 | 176       | 24  | m      | 169   | 68.2 | w     | 5.69 | 117   | 5.04 | 121   | 0.89  |
| 423V11002294 | 189       | 21  | m      | 167.6 | 68.2 | asian | 3.45 | 80    | 2.88 | 78    | 0.83  |
| 423V11001369 | 187       | 50  | f      | 160   | 73.5 | w     | 3.74 | 122   | 3.11 | 122   | 0.83  |
| 423V11001924 | 150       | 28  | f      | 160   | 68.2 | w     | 3.58 | 104   | 2.67 | 90    | 0.74  |
| 423V11002035 | 214       | 22  | m      | 170   | 60   | aa    | 4.24 | 101   | 3.93 | 109   | 0.93  |
| 423V11001462 | 210       | 25  | f      | 160   | 56.8 | aa    | 3.74 | 113   | 2.86 | 108   | 0.83  |
| 423V11001700 | 213       | 27  | m      |       |      |       |      |       | 3.96 | 103   |       |

AVG                      27.5 4m:4f                      3.951429 104.5714                      102.25 0.835714  
SD                      9.396048                      0.828622 14.36265 15.99777 0.061062

### CF SAMPLES

|          |    |   |   |      |     |      | PsA?   | DNase? |
|----------|----|---|---|------|-----|------|--------|--------|
| 012612 K | 39 | f | w |      |     |      |        |        |
| 012612 J | 44 | m | w | 3.07 | 76  | 2    | 0.65 y | n      |
| 011912 F | 27 | f | w | 2.81 | 55  | 0.95 | 0.34 y | n      |
| 011912 D | 21 | f | w | 1.66 | 38  | 1.25 | 0.76 y | y      |
| 011912 H | 29 | m | w | 2.12 | 65  | 1.39 | 0.66 Y | y      |
| 011912 B | 27 | f | w | 4.41 | 82  | 1.99 | 0.45 Y | n      |
| 011912 A | 28 | f | w | 3.1  | 80  | 1.87 | 0.6 Y  | n      |
| 011912 G | 35 | f | w | 3.56 | 101 | 2.85 | 0.8 Y  | y      |
| 011912 E | 33 | f | w | 2.44 | 64  | 1.33 | 0.54 y | y      |
| 011912 I | 26 | f | w | 2.71 | 74  | 1.68 | 0.62 y | y      |
|          |    |   |   | 1.92 | 50  | 0.92 | 0.48 y | y      |

AVG                      30.9 8f: 2m  
SD                      6.854844

2.78                      68.5                      1.623                      0.59 10y                      4n: 6y  
0.816687 18.08775 0.584333 0.141107

# Demographics for Fig 10B and supplementary fig3

|                             | AGE | Gender | FEV1 | DNase | PsA |
|-----------------------------|-----|--------|------|-------|-----|
| NORMAL SAMPLES              |     |        |      |       |     |
| 7/17/2012 IVS-215R          | 27  | m      | 3.95 | n/a   | n/a |
| 7/30/2012 IVS-235R          | 38  | m      | 4.98 | n/a   | n/a |
| 7/30/2012 IVS-216R          | 26  | f      | 3.23 | n/a   | n/a |
| 7/31/2012 IVS-237R          | 29  | f      | 3.47 | n/a   | n/a |
| 7/31/2012 IVS-239R          | 20  | m      | 3.79 | n/a   | n/a |
| 8/1/2012 IVS-233R           | 25  | m      | 4.92 | n/a   | n/a |
| 8/7/2012 IVS-228R           | 28  | m      | 3.78 | n/a   | n/a |
| 8/8/2012 IVS-187R           | 51  | f      | 3.03 | n/a   | n/a |
| 8/10/2012 IVS-240R          | 26  | m      | 3.93 | n/a   | n/a |
| CF SAMPLES                  |     |        |      |       |     |
| 7/13/2012 Dsputum 001       | 24  | F      | 2.61 | no    | no  |
| 9/5/2012 002-TACCO          | 31  | M      | 2.23 | no    | yes |
| 10/2/2012 CF sputum         | 50  | F      | 1.08 | no    | yes |
| 10/7/2012 KH mucus (2)      | 32  | F      | 1.44 | yes   | yes |
| 10/16/2012 CF sputum        | 50  | F      | 1.15 | no    | yes |
| 10/25/2012 CF suptum (AH-2) | 27  | M      | 0.95 | yes   | yes |
| 1/25/2012 CF Sputum (006)   | 30  | F      | 1.74 | no    | yes |
| 11/1/2012 RRL               | 30  | F      | 1.4  | yes   | yes |
| 11/1/2012 CJC               | 30  | F      | 1.51 | yes   | yes |
| 11/1/2012 CLH               | 35  | F      | 2.52 | yes   | yes |
| 11/1/2012 ND                | 32  | F      | 1.61 | no    | yes |
| 11/1/2012 SLW               | 30  | F      | 0.88 | yes   | yes |
| 1/30/2013 013-TACCO         | 30  | F      | 1.74 | no    | yes |
| 1/30/2013 011-TACCO         | 30  | F      | 1.65 | no    | yes |
| CF 121913 DK                | 40  | F      | 0.98 | yes   | yes |
| CF 121913 JG                | 23  | M      | 0.69 | yes   | yes |
| CF 120513JJ                 | 28  | F      | 0.68 | yes   | yes |
| CF 121913 CR                | 29  | F      | 2.28 | yes   | yes |

CF 121913 RCS

24

M

1.85

no

yes

|          |          |        |          |       |       |
|----------|----------|--------|----------|-------|-------|
| AVG norm | 30       | 6M/3F  | 3.897778 | #REF! |       |
| SD norm  | 9.192388 |        | 0.673364 | #REF! |       |
| AVG CF   | 32.92857 | 2M/12F | 1.607857 | #REF! | 8N/6Y |
| SD CF    | 7.640623 |        | 0.540074 | #REF! |       |
